# Supplementary material
Source: PubMed Central journal article supplement (PMC9974894)
Supplement: NIHMS1870903-supplement-1.pdf [file NIHMS1870903-supplement-1.pdf]

## DATA SUPPLEMENT

High pulse pressure impairs cerebral artery endothelial function in young, but not old, mice

Nick R Winder<sup>1</sup>, Emily H Reeve<sup>1</sup>, Elise K Kronquist<sup>1</sup>, Aleena Khurana<sup>1</sup>, Byron Lee<sup>1</sup>, Thuan  
Nguyen<sup>2</sup>, Grant D Henson<sup>1</sup>, Ashley E Walker<sup>1</sup>

<sup>1</sup>Department of Human Physiology, University of Oregon, Eugene, Oregon

<sup>2</sup>School of Public Health, Oregon Health & Science University-Portland State University,  
Portland, Oregon

### Contact information

Ashley E. Walker, PhD

Department of Human Physiology

University of Oregon

181 Esslinger Hall

1240 University of Oregon

Eugene, Oregon, 97403, USA

Phone: (541) 346-5058

e-mail: [awalker@uoregon.edu](mailto:awalker@uoregon.edu)

**Supplemental Table 1. Posterior cerebral artery characteristics**

| Variable                                                 | Young        | Old          | p-value |
|----------------------------------------------------------|--------------|--------------|---------|
| <b>Max Diameter (<math>\mu\text{m}</math>) (n=20,14)</b> | 147 $\pm$ 17 | 150 $\pm$ 14 | 0.33    |
| <b>Spontaneous Tone (% maximal diameter)</b>             |              |              |         |
| Static Pressure (n=20,14)                                | 2 $\pm$ 4    | 8 $\pm$ 16   | 0.11    |
| Low PP (n=17,8)                                          | 3 $\pm$ 4    | 4 $\pm$ 3    | 0.29    |
| High PP (n=9,5)                                          | 3 $\pm$ 4    | 5 $\pm$ 6    | 0.29    |
| Static - LNAME (n=7,6)                                   | 23 $\pm$ 12  | 50 $\pm$ 17  | 0.009 * |
| Low PP – LNAME (n=8,6)                                   | 32 $\pm$ 18  | 39 $\pm$ 12  | 0.23    |
| High PP - LNAME (n=8,5)                                  | 19 $\pm$ 17  | 14 $\pm$ 12  | 0.28    |
| Static – Catalase (n=10,7)                               | 6 $\pm$ 5    | 10 $\pm$ 7   | 0.12    |
| Low PP – Catalase (n=9,8)                                | 7 $\pm$ 9    | 8 $\pm$ 9    | 0.44    |
| High PP – Catalase (n=8,6)                               | 4 $\pm$ 5    | 5 $\pm$ 9    | 0.46    |

Data are mean  $\pm$  SD. PP, pulse pressure. Independent samples t-test with one-tailed p-values displayed. \*p<0.05 vs. young vs. old.

**Supplemental Table 2. Posterior cerebral artery sensitivity to vasodilators**

| EC <sub>50</sub>                                | Young      | Old         | p-value |
|-------------------------------------------------|------------|-------------|---------|
| <b>EC<sub>50</sub> to acetylcholine (log M)</b> |            |             |         |
| Static Pressure (n=20,14)                       | -6.6 ± 0.6 | -6.9 ± 1.2  | 0.25    |
| Low PP (n=17,8)                                 | -6.7 ± 0.9 | -6.9 ± 0.2  | 0.24    |
| High PP (n=9,5)                                 | -7.3 ± 0.6 | -7.4 ± 1.1  | 0.46    |
| Static – LNAME (n=7,6)                          | -5.6 ± 1.5 | -5.7 ± 0.6  | 0.25    |
| Low PP – LNAME (n=8,6)                          | -6.4 ± 1.4 | -6.8 ± 1.5  | 0.33    |
| High PP – LNAME (n=8,5)                         | -6.9 ± 0.9 | -6.1 ± 1.1  | 0.15    |
| Static – Catalase (n=10,7)                      | -8.0 ± 0.8 | -6.9 ± 0.9  | 0.09    |
| Low PP – Catalase (n=9,8)                       | -6.8 ± 0.8 | -7.2 ± 1.3  | 0.13    |
| High PP – Catalase (n=8,6)                      | -6.5 ± 0.7 | -6.66 ± 0.7 | 0.36    |
| <b>EC50 to sodium nitroprusside (log M)</b>     |            |             |         |
| High PP (n=10,11)                               | -6.7 ± 0.4 | -6.6 ± 0.8  | 0.31    |

Data are mean ± SD. PP, pulse pressure. Independent samples t-test with one-tailed p-values displayed.

**Supplemental Table 3. Posterior cerebral artery pre-constriction**

| Pre-constriction (%)                      | Young   | Old     | p-value |
|-------------------------------------------|---------|---------|---------|
| <b>Acetylcholine dose responses</b>       |         |         |         |
| Static Pressure (n=20,14)                 | 29 ± 9  | 30 ± 12 | 0.43    |
| Low PP (n=17,8)                           | 30 ± 10 | 28 ± 10 | 0.34    |
| High PP (n=9,5)                           | 26 ± 1  | 27 ± 3  | 0.38    |
| Static – LNAME (n=7,6)                    | 43 ± 12 | 43 ± 16 | 0.48    |
| Low PP – LNAME (n=8,6)                    | 46 ± 10 | 48 ± 10 | 0.38    |
| High PP – LNAME (n=8,5)                   | 45 ± 17 | 40 ± 9  | 0.25    |
| Static – Catalase (n=10,7)                | 39 ± 8  | 35 ± 10 | 0.18    |
| Low PP – Catalase (n=9,8)                 | 34 ± 10 | 29 ± 6  | 0.12    |
| High PP – Catalase (n=8,6)                | 33 ± 16 | 27 ± 8  | 0.21    |
| <b>Sodium nitroprusside dose response</b> |         |         |         |
| High PP (n=10,11)                         | 29 ± 13 | 36 ± 16 | 0.15    |

Data are mean ± SD. PP, pulse pressure. Independent samples t-test with one-tailed p-values displayed.

**Supplemental Table 4. Posterior cerebral artery distension during pulse pressure application**

| Variable                                                  | Young         | Old            | p=value |
|-----------------------------------------------------------|---------------|----------------|---------|
| <b>Low pulse pressure</b>                                 |               |                |         |
| Absolute change in diameter ( $\mu\text{m}$ )<br>(n=16,9) | 6 $\pm$ 3     | 6 $\pm$ 2      | 0.41    |
| Peterson's elastic modulus (mmHg)<br>(n=16,9)             | 830 $\pm$ 509 | 571 $\pm$ 154  | 0.07    |
| <b>High pulse pressure</b>                                |               |                |         |
| Absolute change in diameter ( $\mu\text{m}$ )<br>(n=16,9) | 12 $\pm$ 5    | 8 $\pm$ 4      | 0.02 *  |
| Peterson's elastic modulus (mmHg)<br>(n=13,12)            | 777 $\pm$ 384 | 1292 $\pm$ 816 | 0.03 *  |

Data are mean  $\pm$  SD. Absolute change in diameter: independent samples t-test. Peterson's elastic modulus: Mann-Whitney U test. One-tailed p-values displayed. \*p<0.05 young vs. old.
